# Supplementary material for: MicroRNA Expression Profiling in PBMCs: A Potential Diagnostic Biomarker of Chronic Hepatitis C
Source: Hindawi journal article supplement (doi:10.1155/2014/367157), 2014-01-01
Supplement: f1 [file 367157.f1.pdf]

Supplemental Table 1. Correlation of target miRNAs expression and clinical parameters in PBMC of CHC patients.

|             | Age                           | Hcv RNA                       | AST                           | ALT                           | rGT                           |
|-------------|-------------------------------|-------------------------------|-------------------------------|-------------------------------|-------------------------------|
| miR-193b    | $r^2 = 0.026$<br>$p = 0.854$  | $r^2 = -0.153$<br>$p = 0.285$ | $r^2 = -0.189$<br>$p = 0.207$ | $r^2 = -0.093$<br>$p = 0.518$ | $r^2 = -0.090$<br>$p = 0.648$ |
| miR-199a-3p | $r^2 = -0.117$<br>$p = 0.417$ | $r^2 = -0.161$<br>$p = 0.265$ | $r^2 = -0.080$<br>$p = 0.600$ | $r^2 = -0.068$<br>$p = 0.639$ | $r^2 = -0.136$<br>$p = 0.491$ |
| miR-122     | $r^2 = -0.038$<br>$p = 0.790$ | $r^2 = 0.019$<br>$p = 0.895$  | $r^2 = -0.021$<br>$p = 0.889$ | $r^2 = 0.002$<br>$p = 0.987$  | $r^2 = 0.254$<br>$p = 0.192$  |
| miR-16      | $r^2 = 0.059$<br>$p = 0.693$  | $r^2 = -0.061$<br>$p = 0.679$ | $r^2 = 0.013$<br>$p = 0.936$  | $r^2 = -0.034$<br>$p = 0.817$ | $r^2 = -0.089$<br>$p = 0.657$ |
| miR-214     | $r^2 = 0.050$<br>$p = 0.731$  | $r^2 = -0.058$<br>$p = 0.695$ | $r^2 = 0.279$<br>$P = 0.067$  | $r^2 = 0.241$<br>$p = 0.095$  | $r^2 = 0.001$<br>$p = 0.996$  |
| miR-222     | $r^2 = 0.045$<br>$p = 0.763$  | $r^2 = -0.113$<br>$p = 0.445$ | $r^2 = 0.037$<br>$P = 0.814$  | $r^2 = -0.059$<br>$p = 0.692$ | $r^2 = -0.180$<br>$p = 0.369$ |
| miR-324-3p  | $r^2 = 0.032$<br>$p = 0.830$  | $r^2 = -0.084$<br>$p = 0.570$ | $r^2 = 0.044$<br>$P = 0.779$  | $r^2 = -0.034$<br>$p = 0.820$ | $r^2 = -0.114$<br>$p = 0.571$ |

Supplemental Table 2. Multi-variant logistic regression analysis of the risk of CHC.

| Parameters         | Favorable/ unfavorable | OR    | 95% CI       |        |
|--------------------|------------------------|-------|--------------|--------|
| p value            |                        |       |              |        |
| Gender             | Female/male            | 0.302 | 0.106-0.862  | 0.025  |
| Age                | per year               | 1.174 | 1.103-1.249  | <0.001 |
| BMI                | ≥27/<27                | 2.226 | 0.407-12.187 | 0.356  |
| Two targets miRNAs |                        |       |              |        |
|                    | High / low             | 6.545 | 2.180-19.651 | 0.001  |

Two targets miRNAs were including mir-193b and mir-199a-3p.
